# Supplementary material
Source: PubMed Central journal article supplement (PMC6719313)
Supplement: NIHMS1047789-supplement-supplemental.pdf [file NIHMS1047789-supplement-supplemental.pdf]

Supporting Information  
for

Triphenyl Phosphonium (TPP)-Derived Protein Sulfenic Acid  
Trapping Agents: Synthesis, Reactivity and Effect on  
Mitochondrial Function

Zhe Li,<sup>†</sup> Tom E. Forshaw,<sup>‡,||</sup> Reetta J. Holmila,<sup>‡,||</sup> Stephen A. Vance,<sup>†||</sup> Hanzhi Wu,<sup>‡,||</sup> Leslie B. Poole,<sup>§,||</sup> Cristina M. Furdui,<sup>‡,||</sup> S. Bruce King<sup>\*,†,||</sup>

<sup>†</sup>Department of Chemistry, Wake Forest University, Winston-Salem, North Carolina, USA

<sup>‡</sup>Department of Internal Medicine, Wake Forest School of Medicine, Winston-Salem, North Carolina, USA

<sup>§</sup>Department of Biochemistry, Wake Forest School of Medicine, Winston-Salem, North Carolina, USA

<sup>||</sup>Center for Redox Biology and Medicine, Wake Forest School of Medicine, Winston-Salem, North Carolina, USA

\* Corresponding Author: S. Bruce King, Department of Chemistry, Wake Forest University, Winston-Salem, NC, USA 27101. Tel: 336 702 1954, Fax: 336 758 4656, e-mail:

kingsb@wfu.edu

## Table of contents

|                                                                                    |     |
|------------------------------------------------------------------------------------|-----|
| General Considerations .....                                                       | S3  |
| Spectroscopic Characterization of Synthetic Intermediates and Final Products ..... | S3  |
| <u>Figure S1</u> . Proton NMR of <b>3</b> .....                                    | S3  |
| <u>Figure S2</u> . Carbon NMR of <b>3</b> .....                                    | S4  |
| <u>Figure S3</u> . Phosphorus NMR of <b>3</b> .....                                | S5  |
| <u>Figure S4</u> . MS of <b>3</b> .....                                            | S6  |
| <u>Figure S5</u> . Proton NMR of <b>1</b> .....                                    | S7  |
| <u>Figure S6</u> . Carbon NMR of <b>1</b> .....                                    | S8  |
| <u>Figure S7</u> . Phosphorus NMR of <b>1</b> .....                                | S9  |
| <u>Figure S8</u> . MS of <b>1</b> .....                                            | S10 |
| <u>Figure S9</u> . Proton NMR of <b>2</b> .....                                    | S11 |
| <u>Figure S10</u> . Carbon NMR of <b>2</b> .....                                   | S12 |
| <u>Figure S11</u> . Phosphorus NMR of <b>2</b> .....                               | S13 |
| <u>Figure S12</u> . MS of <b>2</b> .....                                           | S14 |
| UV-Vis Kinetics; Fries Acid + <b>2</b> .....                                       | S14 |
| <u>Figure S13</u> . UV-Vis Kinetics; Fries Acid + <b>2</b> .....                   | S15 |
| Reactivity of BCN-OH with C165A AhpC-SSH .....                                     | S16 |
| <u>Figure S14</u> . Reaction Kinetics of BCN-OH with C165A AhpC-SSH .....          | S16 |

## General Considerations

All chemicals were purchased from commercial vendors and used as received. TLC was performed on Sorbent polyester-backed Silica G plates with UV254 indicator. Visualization was accomplished with UV light unless otherwise indicated. Solvents for extraction and purification were of technical grade and used as received. Liquid chromatography–mass spectrometry (LC-MS) solvents were HPLC grade. For small molecule experiments, ESI-MS was performed on an Agilent 100 Series LC/MSD ion trap.  $^1\text{H}$  and  $^{13}\text{C}$  NMR spectra were recorded using a Bruker Avance 300 or 500 MHz NMR spectrometer. Chemical shifts are given in ppm ( $\delta$ ); multiplicities are indicated by s (singlet), d (doublet), t (triplet), q (quartet), m (multiplet). UV–vis spectroscopy was performed on a Cary 50 UV-vis spectrophotometer.

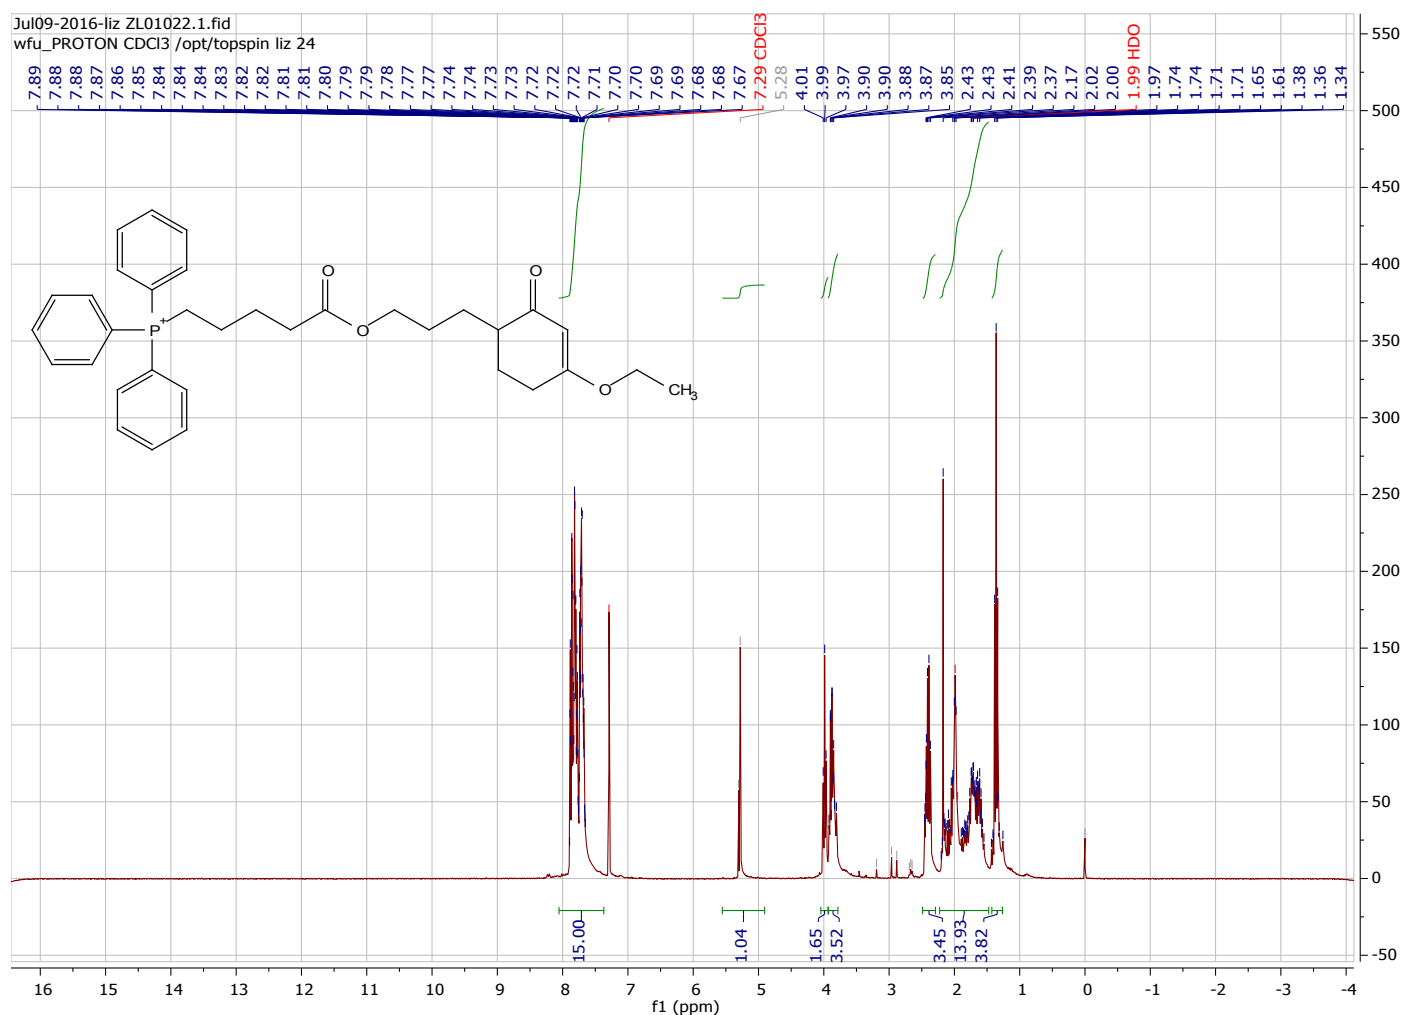

Figure S1.  $^1\text{H}$  NMR Spectrum of **3**.

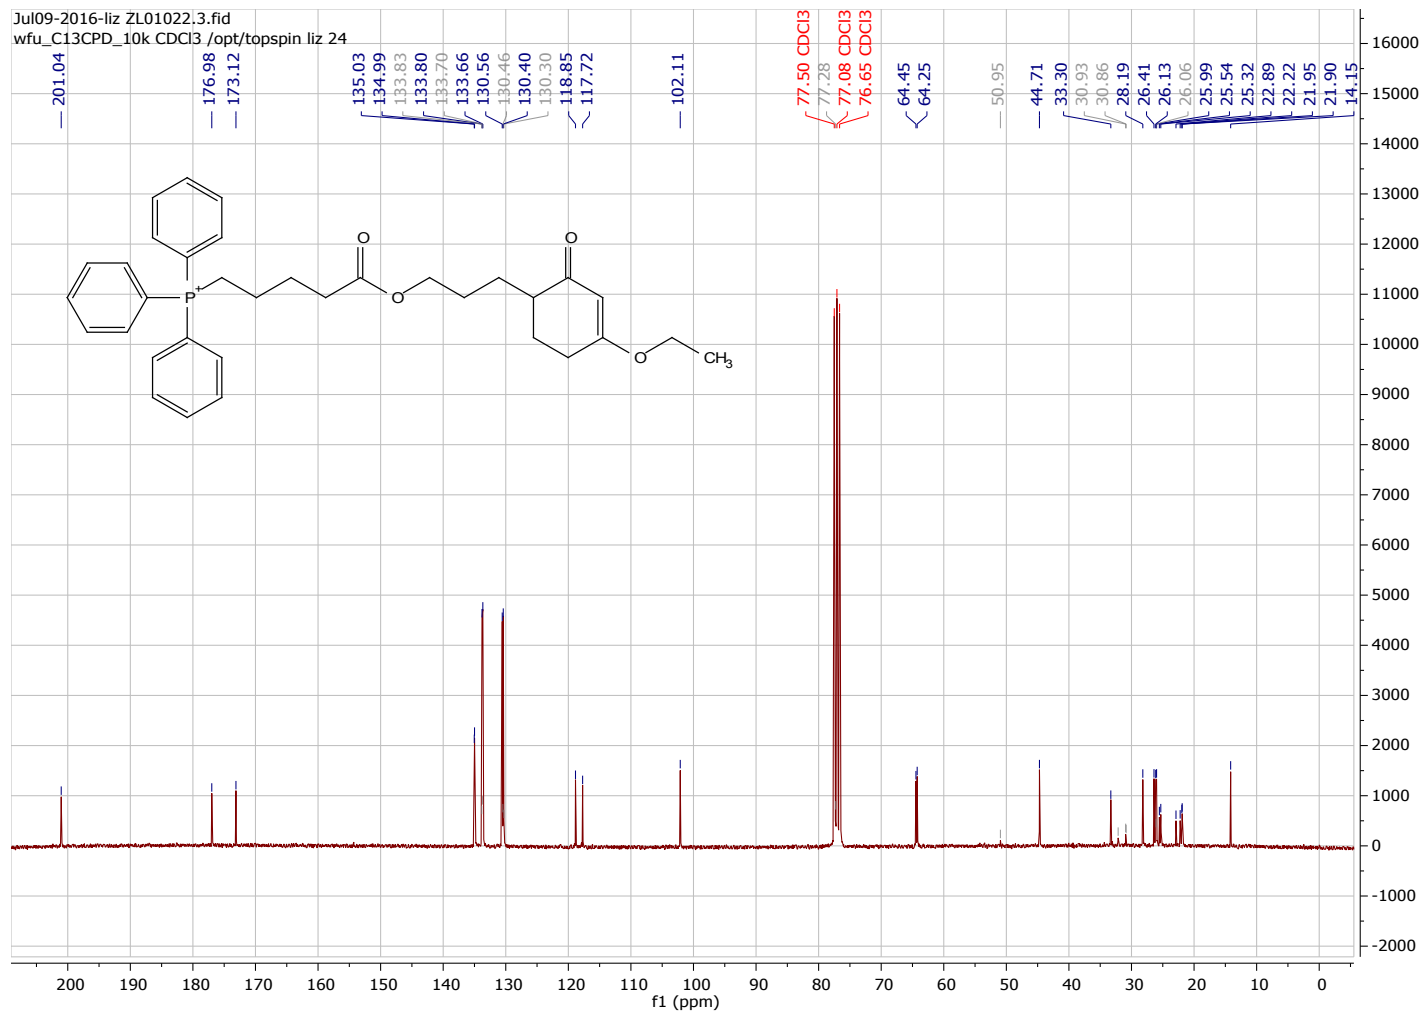

Figure S2.  $^{13}\text{C}$  NMR Spectrum of **3**.

Jul09-2016-liz ZL01022.2.fid  
wfu\_P31CPD CDCl3 /opt/topspin liz 24

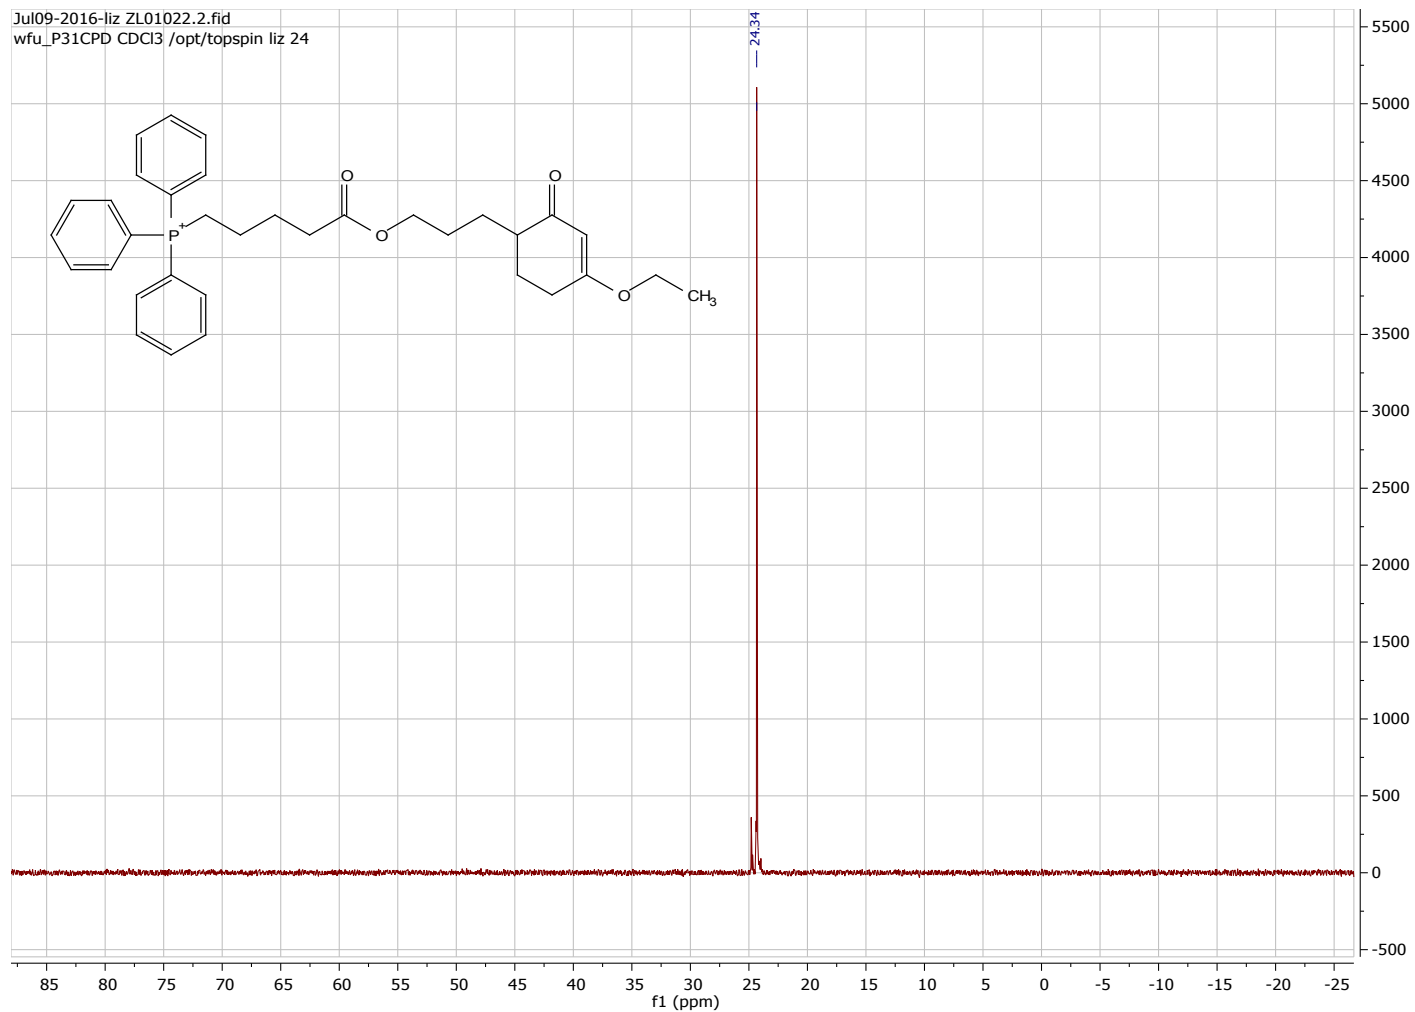

Figure S3.  $^{31}\text{P}$  NMR Spectrum of **3**.

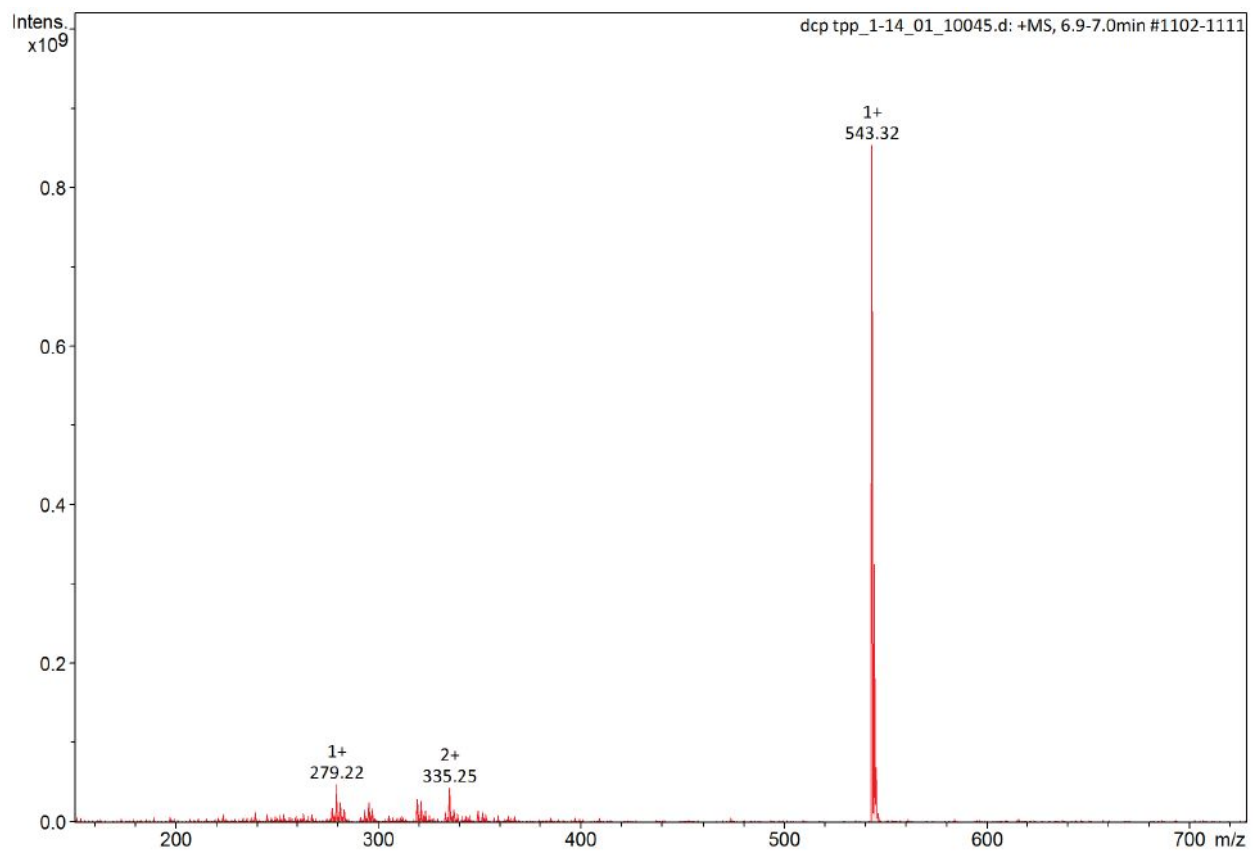

Figure S4. MS of **3**.

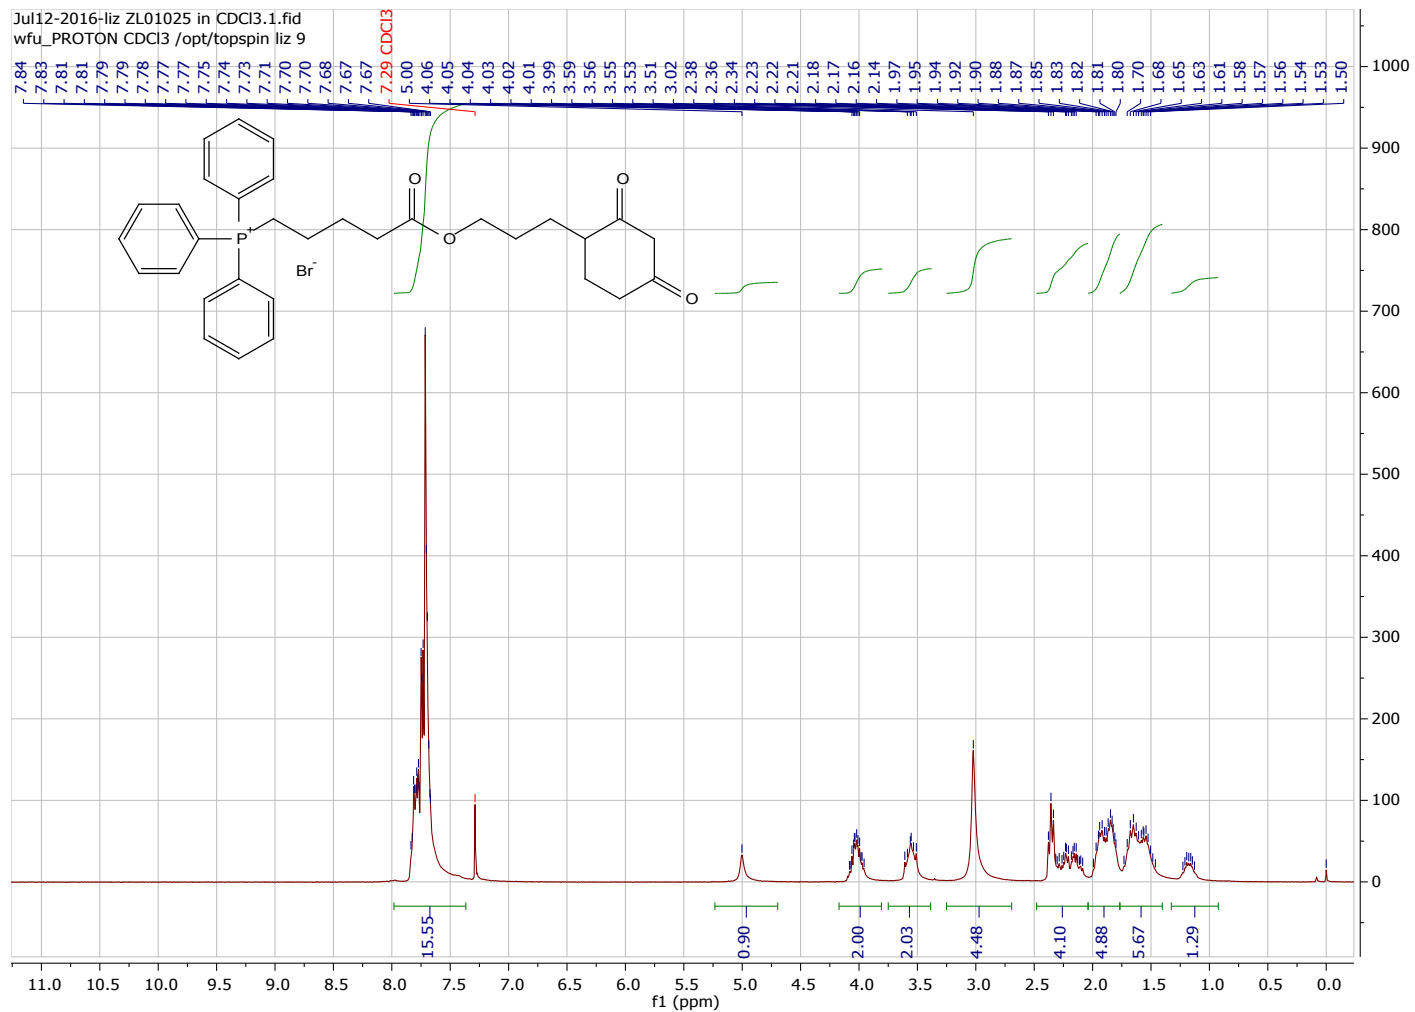

Figure S5.  $^1\text{H}$  NMR Spectrum of 1.

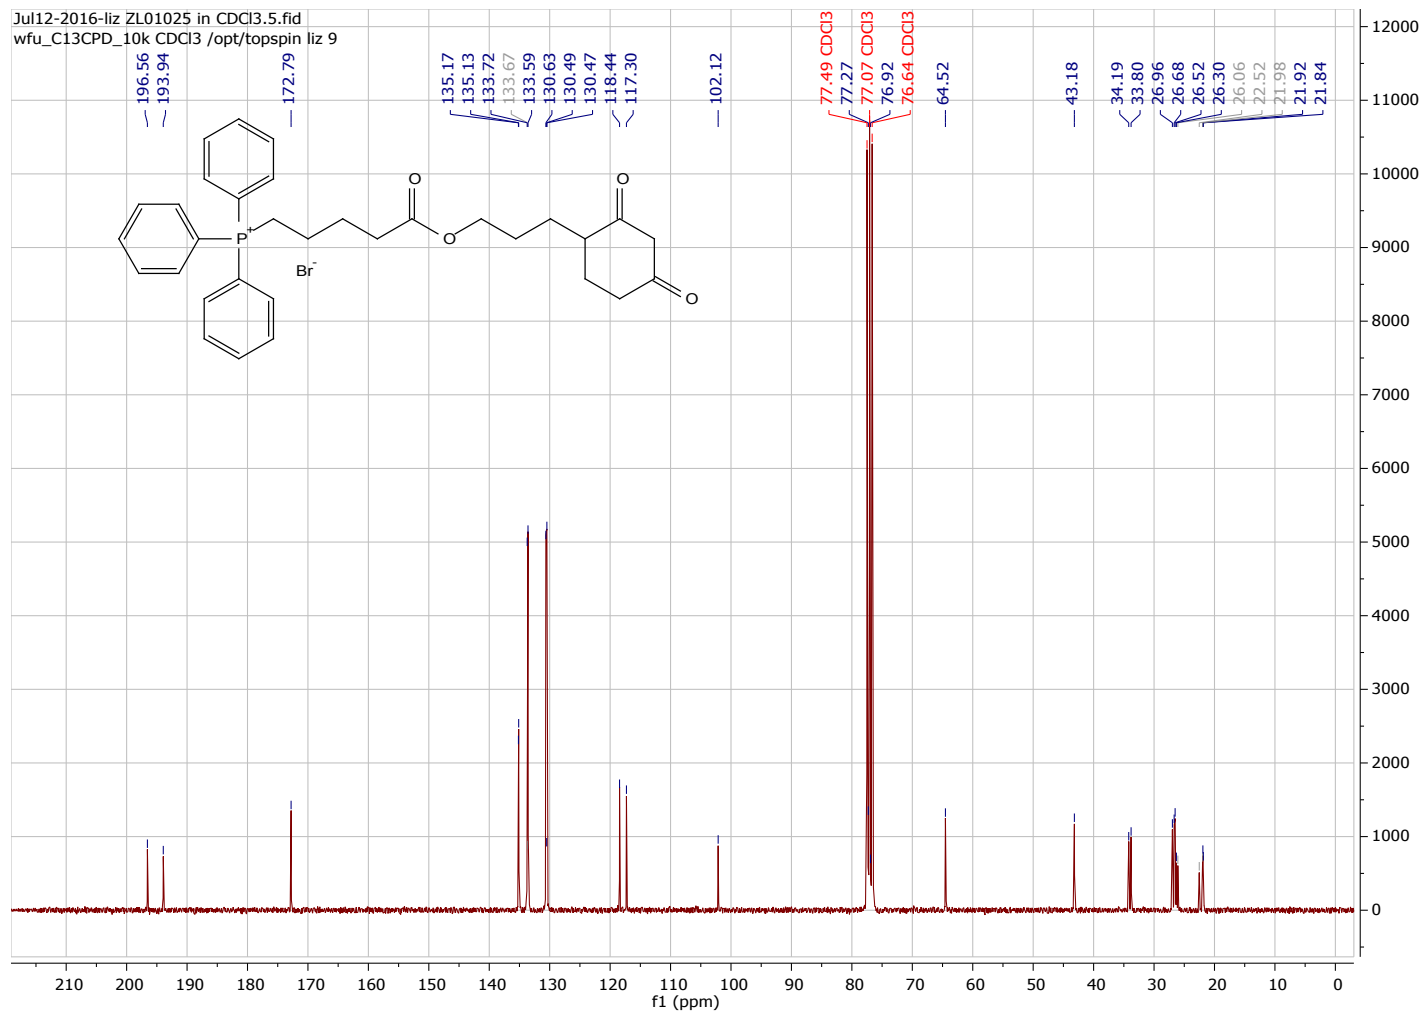

Figure S6.  $^{13}\text{C}$  NMR Spectrum of **1**.



Jul12-2016-liz ZL01025 in CDCl3.2.fid  
wfu\_P31CPD CDCI3 /opt/topspin liz 9

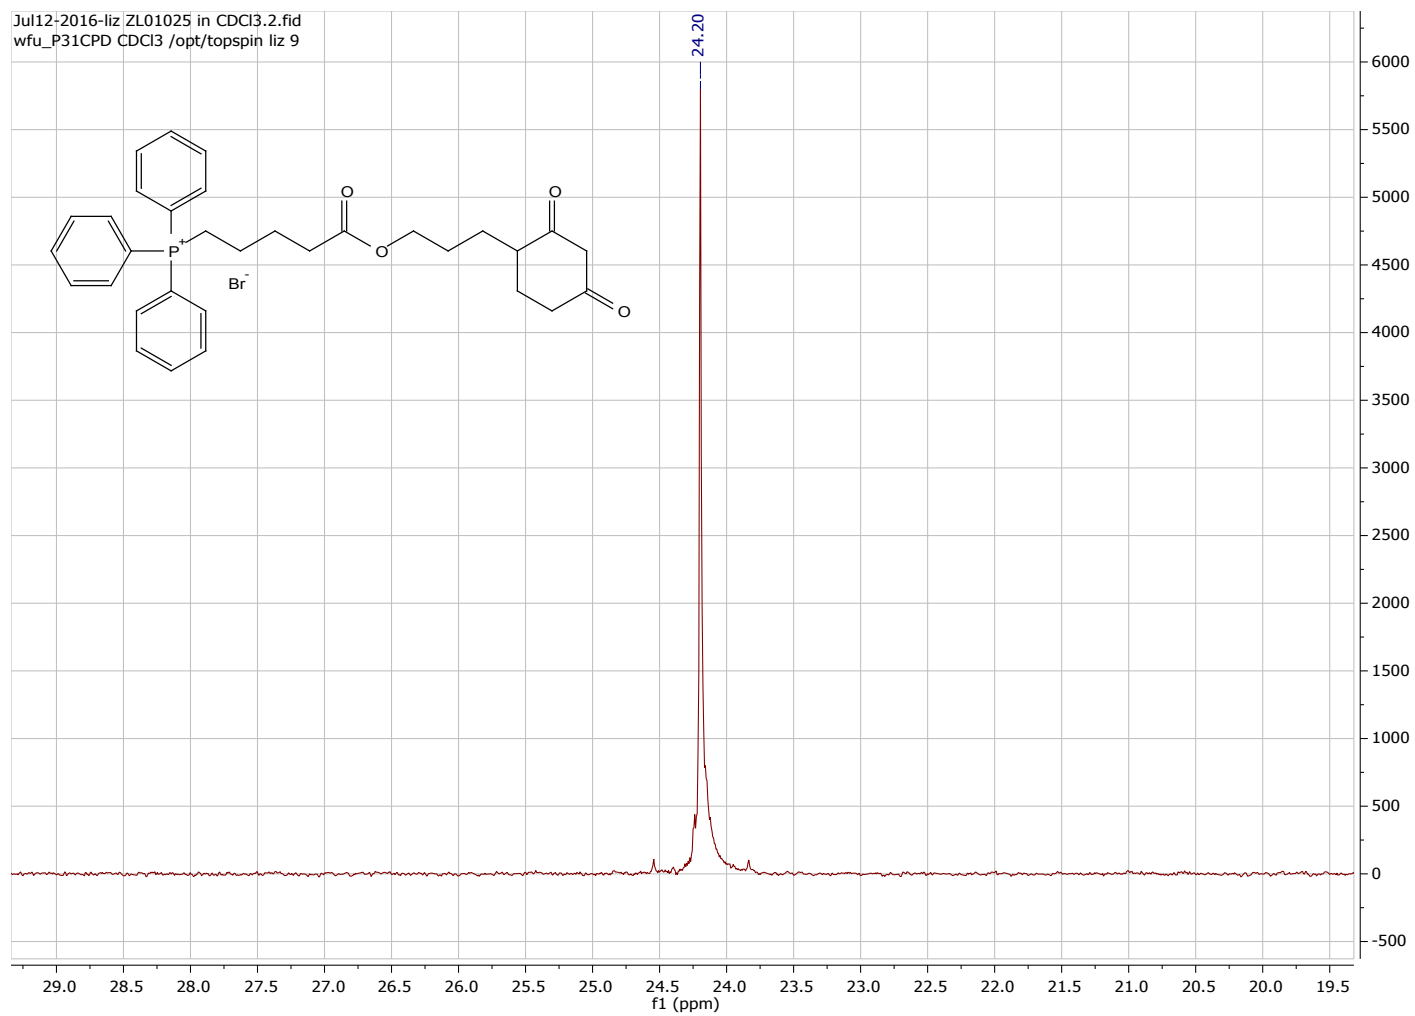

Figure S7.  $^{31}\text{P}$  NMR Spectrum of **1**.

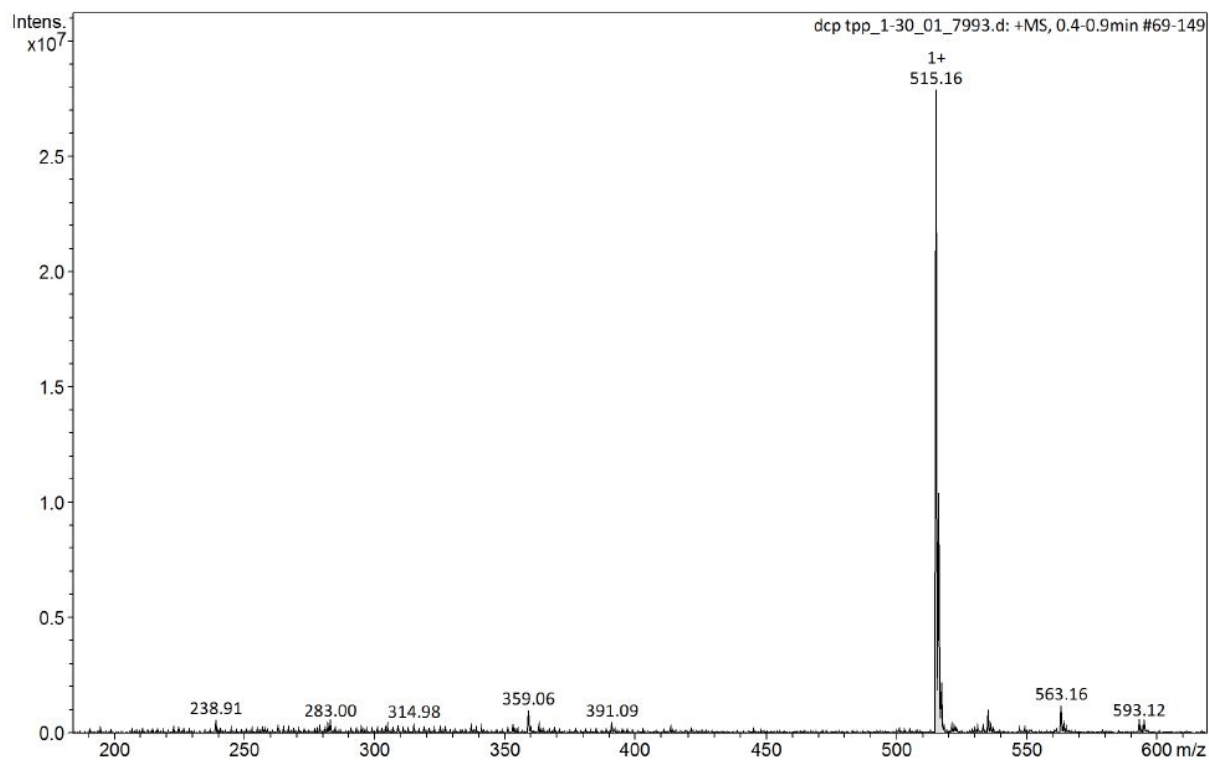

Figure S8. MS of **1**.

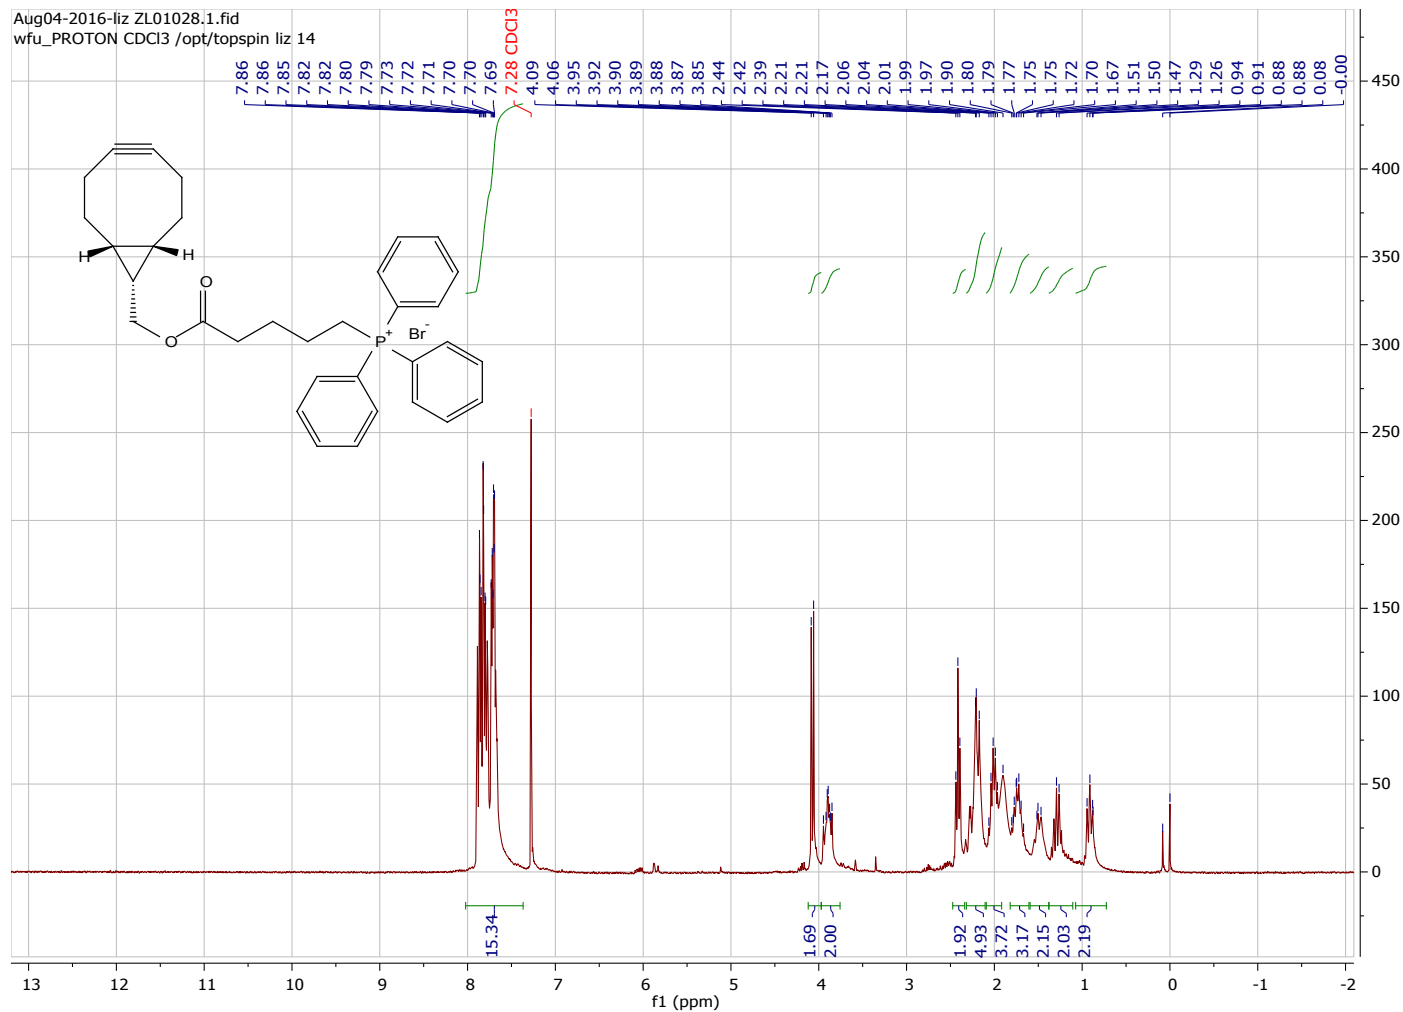

Figure S9.  $^1\text{H}$  NMR Spectrum of **2**.

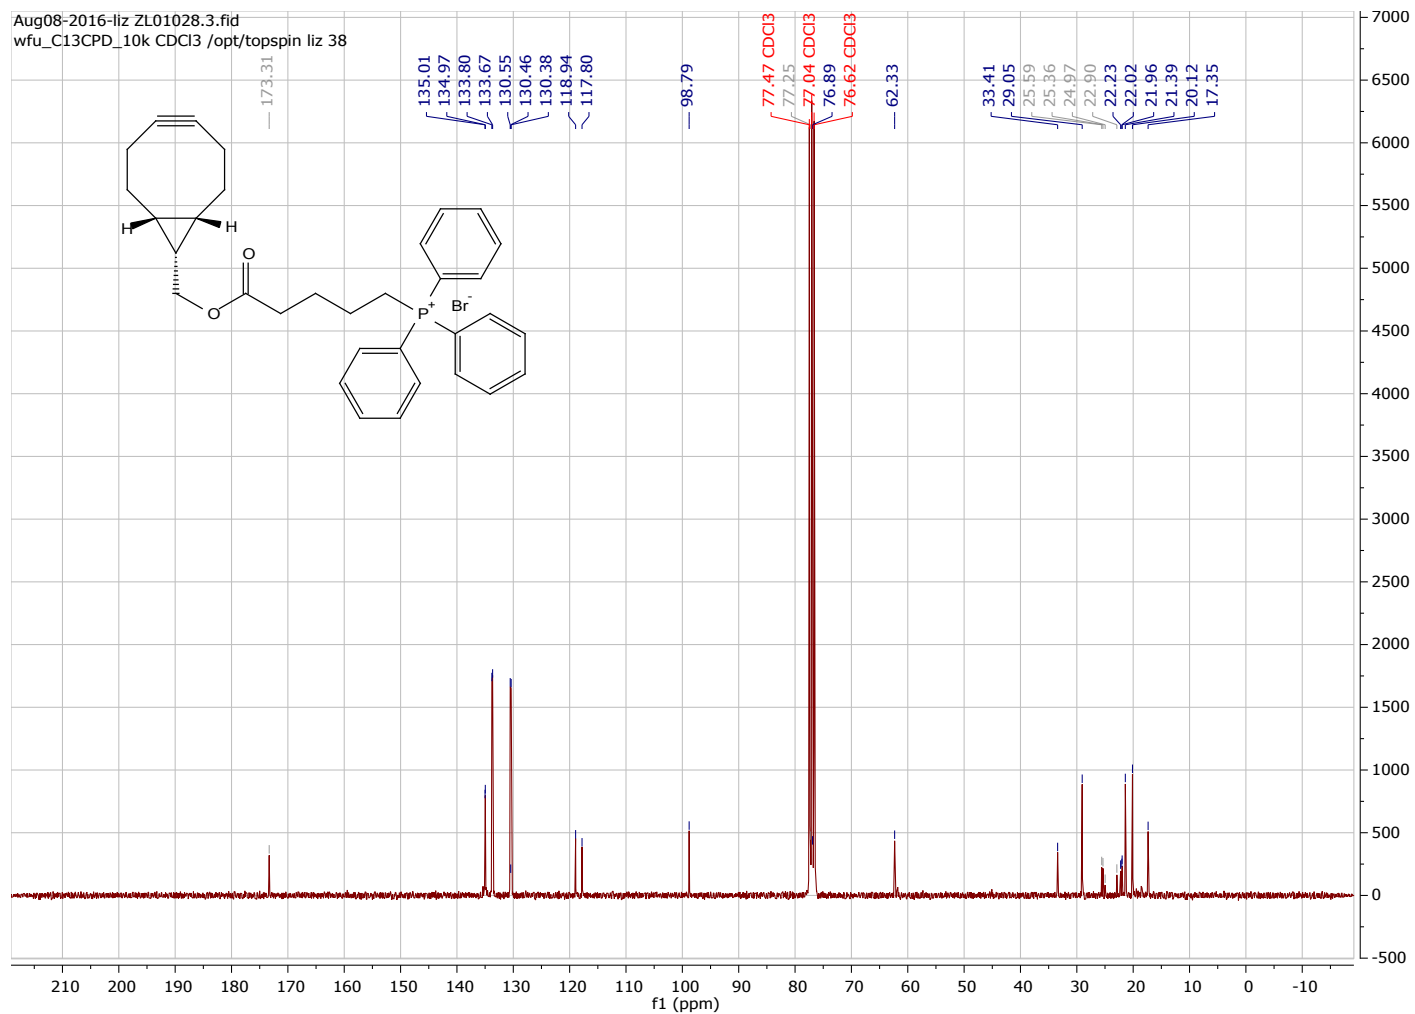

Figure S10. <sup>13</sup>C NMR Spectrum of 2.

Aug08-2016-liz ZL01028.2.fid  
wfu\_P31CPD CDCl3 /opt/topspin liz 38

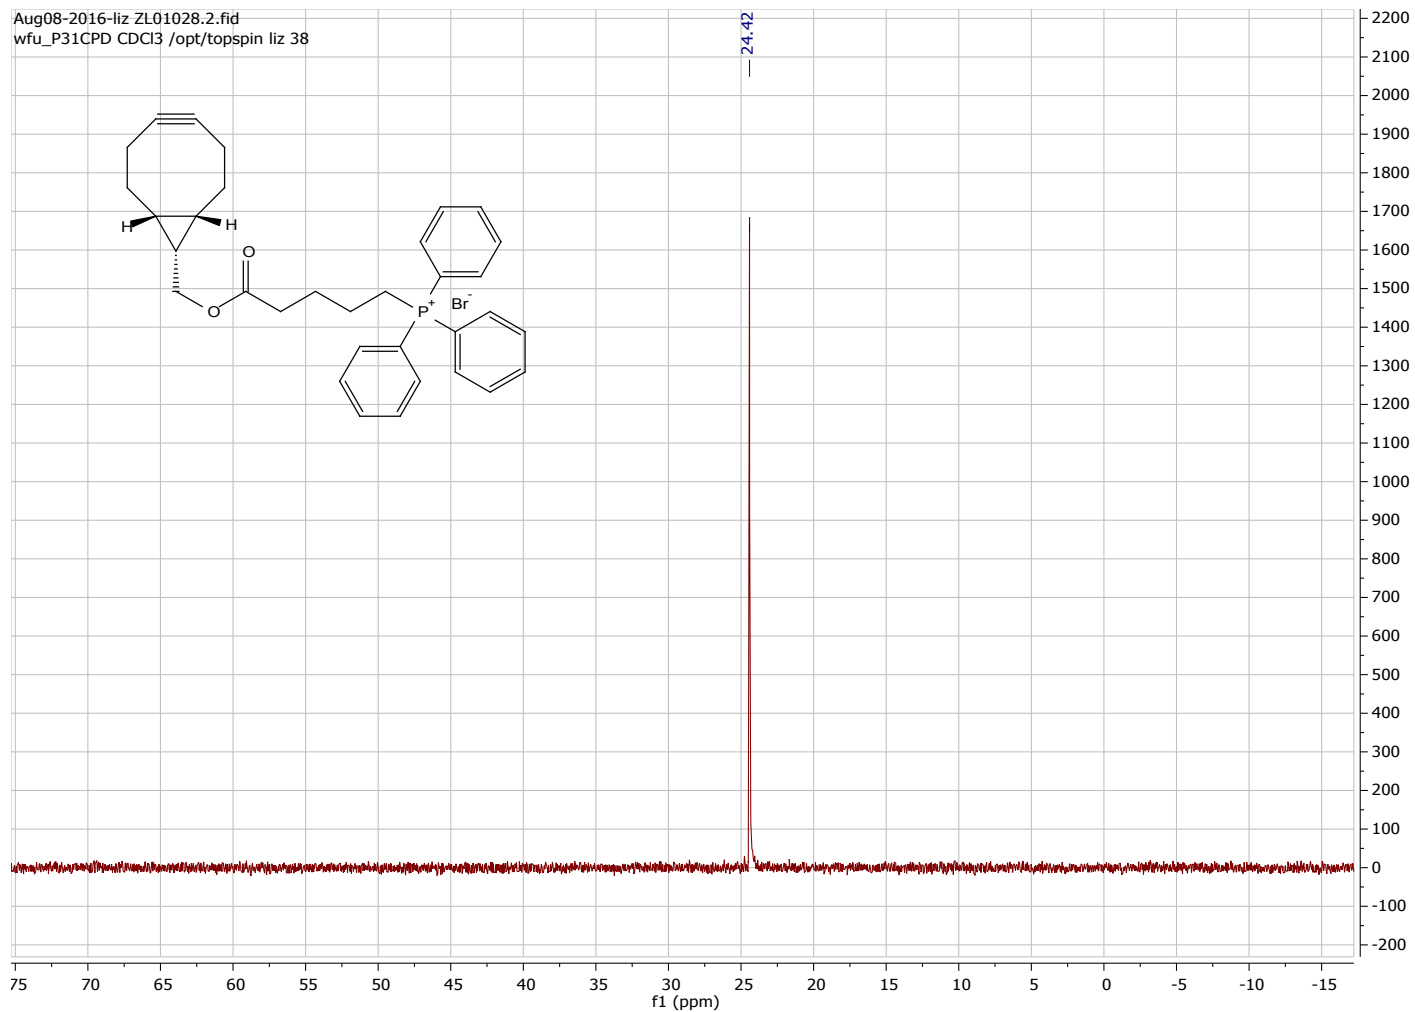

Figure S11.  $^{31}\text{P}$  NMR Spectrum of **2**.

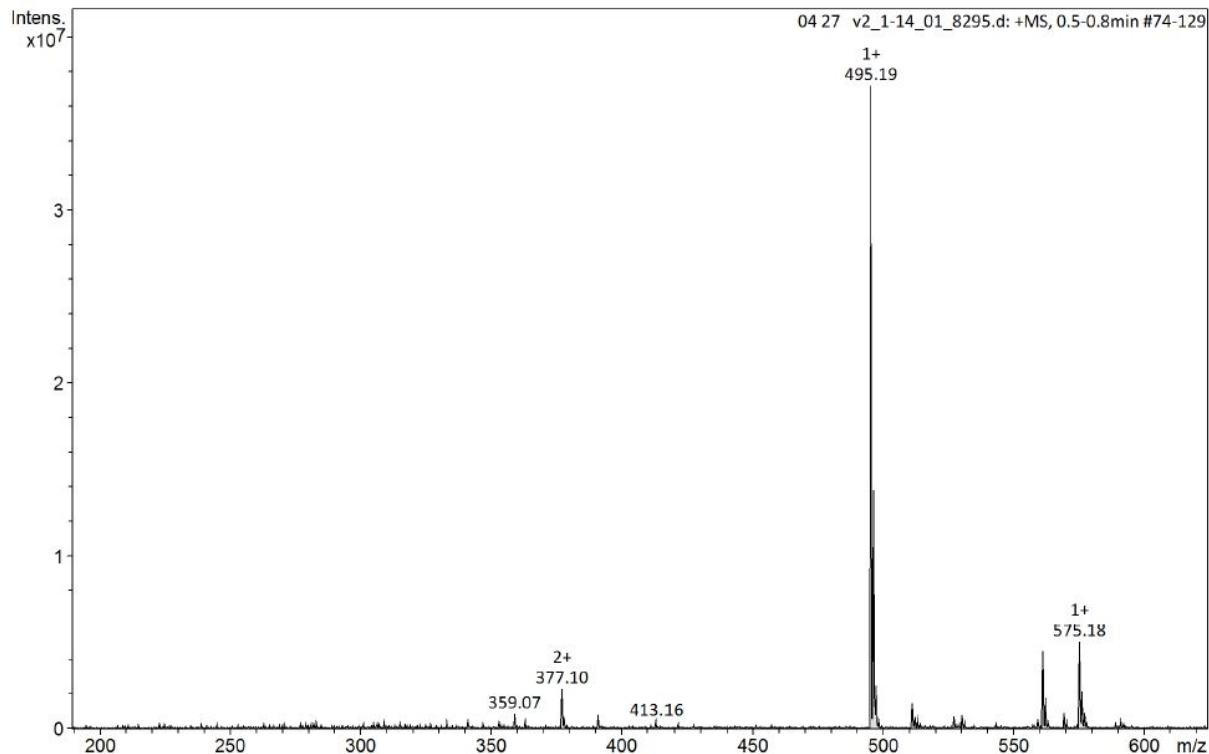

Figure S12. MS of **2**.

*UV-Vis Kinetic Analysis; Fries Acid + BCN-TPP (2)*

Stock solutions of Fries acid (1 mM) and BCN-TPP (**2**, 20 mM) in acetonitrile were prepared. In a 1 mL UV-Vis cuvette, the Fries acid stock solution (0.1 mL) was diluted with acetonitrile (0.8 mL) cuvette and lastly the stock solution of BCN-TPP (**2**, 0.1 mL) was added, followed by a quick shake of the cuvette. The cuvette was immediately loaded into a Varian Cary 50 Bio UV-Vis spectrophotometer and measurements began. This experiment was repeated at identical concentrations and twice at half the **2** concentrations (0.05 mL of **2** and 0.85 mL of MeCN). UV-vis data was recorded at 453 nm with 6 second intervals over 10 minutes and averaged at each time point. SigmaPlot was utilized to plot data using exponential decay with the equation:  $f = y_0 + a(e^{-bx})$ . Data is shown in Figure S13.

### BCN-TPP

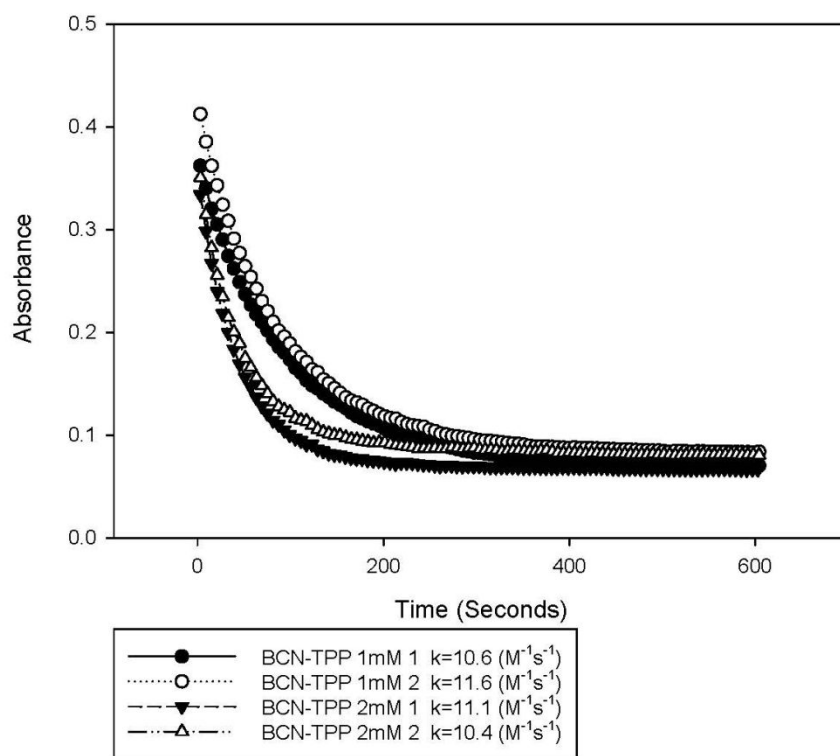

Figure S13. Kinetic monitoring of the reaction of Fries acid (0.1 mM) and TPP-BCN (**2**, 1 and 2 mM) in acetonitrile at room temperature at 453 nm.

Reactivity of BCN-OH with C165A AhpC-SSH

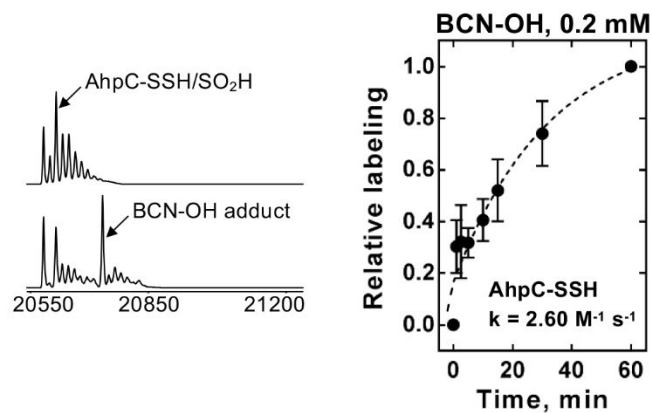

Figure S14. Reaction kinetics of BCN-OH with AhpC-SSH. Oxidized protein was reacted with BCN-OH and set timepoints samples were taken, desalted, and species abundance determined using ESI-TOF MS. To account for differences in batches of AhpC-SSH, the plateau of each reaction is normalized to a value of 1 and all data points are expressed as relatives of the plateau.
